# Supplementary material
Source: PubMed Central journal article supplement (PMC4273385)
Supplement: pnas.201421438si.pdf [file pnas.201421438si.pdf]

# Supporting Information

Samanta et al. 10.1073/pnas.1421438111

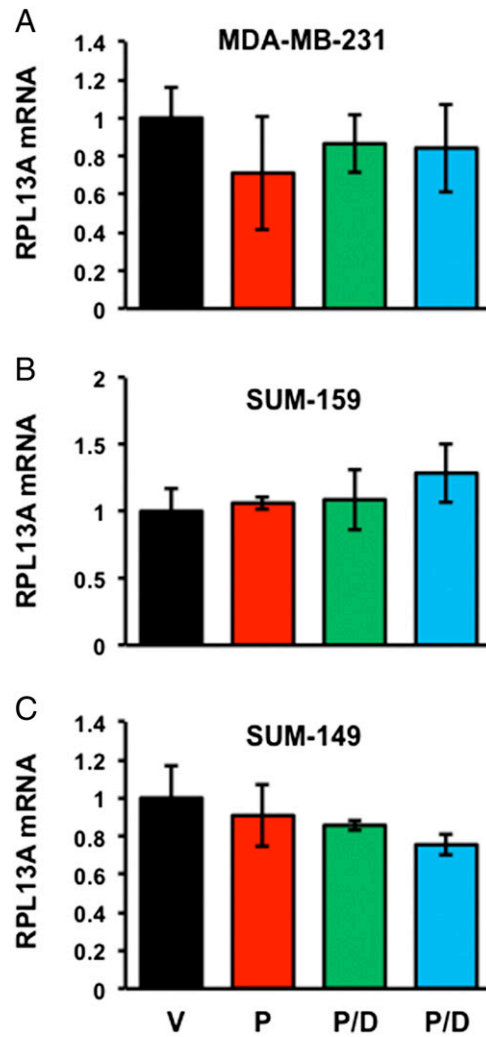

**Fig. S1.** RPL13A mRNA was analyzed as a representative non-HIF-regulated gene product. MDA-MB-231 (A), SUM-159 (B), and SUM-149 (C) cells were treated with vehicle or either 10 nM (MDA-231 and SUM-159) or 5 nM (SUM-149) paclitaxel, either alone (P) or in combination with 100 nM digoxin (P/D) or 1  $\mu$ M acriflavine (P/A) for 4 d. RT-qPCR analyses were performed to assess the expression of RPL13A mRNA relative to 18S rRNA in the same sample and normalized to vehicle-treated cells (mean  $\pm$  SEM;  $n = 3$ ).

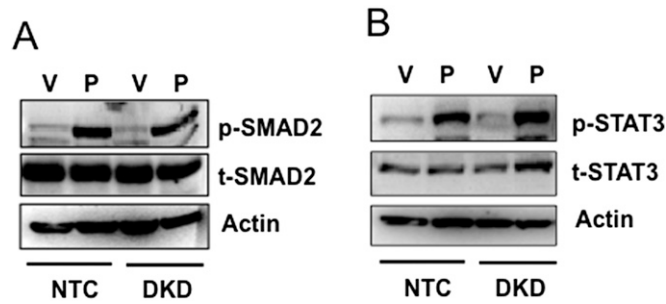

**Fig. S2.** SMAD2 and STAT3 are phosphorylated in response to paclitaxel in the presence or absence of HIF activity. NTC and DKD subclones of MDA-MB-231 cells were treated with either vehicle or 10 nM paclitaxel for 4 d and immunoblot assays were performed using antibodies specific for phosphorylated (p-) and total (t-) SMAD2 (A) or STAT3 (B).

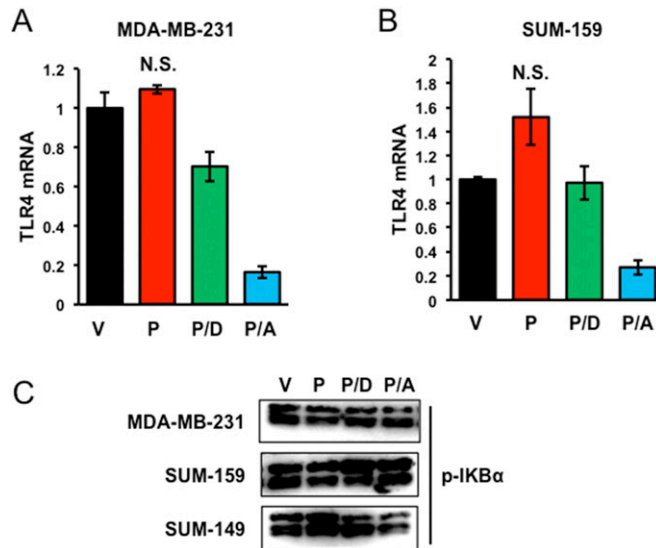

**Fig. S3.** TLR-4 expression and I $\kappa$ B phosphorylation are not affected by paclitaxel treatment of TNBC cell lines. (A and B) MDA-MB-231 (A) and SUM-159 (B) cells were treated with vehicle (V) or 10 nM paclitaxel, either alone (P) or in combination with 100 nM digoxin (P/D) or 1  $\mu$ M acriflavine (P/A), for 4 d. RT-qPCR analyses were performed to quantify TLR-4 mRNA relative to 18S rRNA in the same sample and normalized to V (mean  $\pm$  SEM;  $n = 3$ ). N.S., not significant. (C) MDA-MB-231, SUM-159, and SUM-149 cells were treated with vehicle or either 10 nM (MDA-MB-231 and SUM-159) or 5 nM (SUM-149) paclitaxel, either alone (P) or in combination with 100 nM digoxin (P/D) or 1  $\mu$ M acriflavine (P/A) for 4 d, and immunoblot assays were performed using antibodies specific for phosphorylated I $\kappa$ B $\alpha$ .





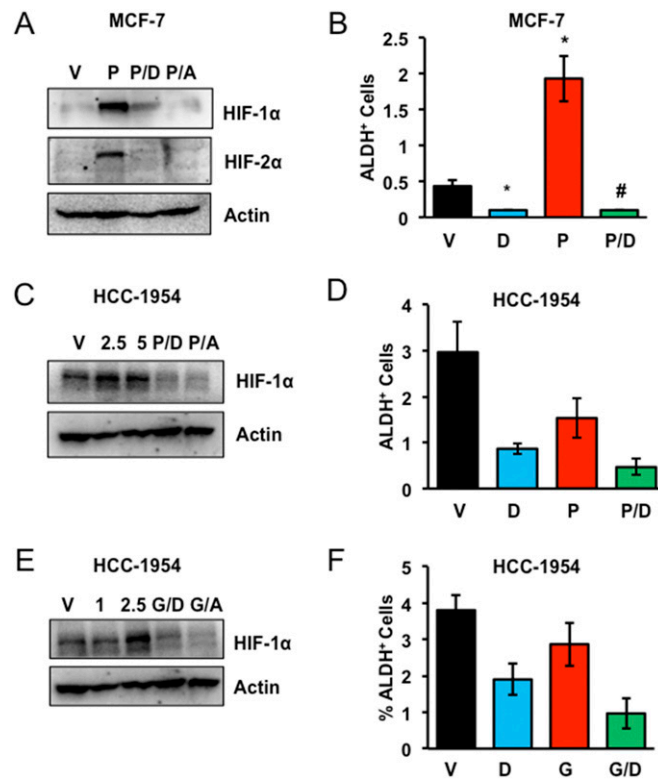

**Fig. 56.** Effect of paclitaxel or gemcitabine treatment of other breast cancer cell types. (A and B) MCF-7 cells were treated with vehicle (V) or 10 nM paclitaxel, either alone (P) or in combination with 100 nM digoxin (P/D) or 1  $\mu$ M acriflavine (P/A) for 4 d and immunoblot (A) or Aldefluor (B) assays were performed (mean  $\pm$  SEM;  $n = 3$ ). \* $P < 0.001$  compared with V, and # $P < 0.001$  compared with P, by Student's  $t$  test. (C) HCC-1954 cells were treated with vehicle (V), 2.5 or 5 nM paclitaxel alone, or 2.5 nM paclitaxel in combination with 100 nM digoxin (P/D) or 1  $\mu$ M acriflavine (P/A) for 4 d, and immunoblot assays were performed. (D) HCC-1954 cells were treated with vehicle (V), digoxin (D; 100 nM), paclitaxel (P; 2.5 nM), or both paclitaxel and digoxin (P/D) for 4 d, and Aldefluor assays were performed (mean  $\pm$  SEM;  $n = 3$ ). (E) HCC-1954 cells were treated with vehicle (V), 1 or 2.5 nM gemcitabine alone, or 2.5 nM gemcitabine in combination with 100 nM digoxin (G/D) or 1  $\mu$ M acriflavine (G/A) for 4 d, and immunoblot assays were performed. (F) HCC-1954 cells were treated with vehicle (V), digoxin (D; 100 nM), gemcitabine (G; 2.5 nM), or both gemcitabine and digoxin (G/D) for 4 d, and Aldefluor assays were performed (mean  $\pm$  SEM;  $n = 3$ ).
